# Supplementary material for: Comprehensive evaluation and characterisation of short read general-purpose structural variant calling software
Source: PubMed Central journal article supplement (PMC6642177; doi:10.1038/s41467-019-11146-4), 2019-07-19
Supplement: 41467_2019_11146_MOESM4_ESM.pdf [file 41467_2019_11146_MOESM4_ESM.pdf]

## **Description of Additional Supplementary Files**

### **Supplementary Data 1:**

Precision, FDR, sensitivity, and F-score for all x of y ensemble call sets for NA12878, CHM1, CHM13, CHM1/CHM13 synthetic diploid, and HG002.
